# Supplementary material
Source: publisher site journal article supplement (https://www.kjim.org/upload/media/kjim-2024-339-Supplementary-Table-4.pdf)
Supplement: Supplementary file 1 [file kjim-2024-339-Supplementary-Table-4.pdf]

**Supplementary Table 4. Random forest classifier analysis of urine samples by groups**

| Act. group                  | Pred. group (train set) |    |    |    | Correctly classified | Pred. group (test set) |    |    |    | Correctly classified |       |
|-----------------------------|-------------------------|----|----|----|----------------------|------------------------|----|----|----|----------------------|-------|
|                             | Control                 | LG | HG | GC |                      | Control                | LG | HG | GC |                      |       |
| Control                     | 72                      | 0  | 0  | 0  | 100.0%               | 28                     | 0  | 0  | 0  | 100.0%               |       |
| LG                          | 6                       | 43 | 11 | 9  | 62.3%                | 2                      | 20 | 2  | 7  | 64.5%                |       |
| HG                          | 3                       | 5  | 56 | 4  | 82.4%                | 4                      | 1  | 25 | 2  | 78.1%                |       |
| GC                          | 9                       | 5  | 5  | 52 | 73.2%                | 3                      | 1  | 3  | 22 | 75.9%                |       |
| Overall correct class. Rate |                         |    |    |    | 79.6%                |                        |    |    |    |                      | 79.2% |

The random forest classifier was performed using *Cutibacterium acnes*, *Ralstonia insidiosa*, and *Pseudomonas antarctica*, identified as group-discriminative by MaAsLin2 analysis of urine samples. To address sample imbalance, SMOTE was applied, generating a balanced dataset of 100 samples.

Pred., predicted group; Act., actual group; LG, low-grade dysplasia; HG, high-grade dysplasia; GC, gastric cancer.
